# Supplementary material
Source: PubMed Central journal article supplement (PMC3911049)
Supplement: AEM.03504-13_zam999105129so1.pdf [file AEM.03504-13_zam999105129so1.pdf]

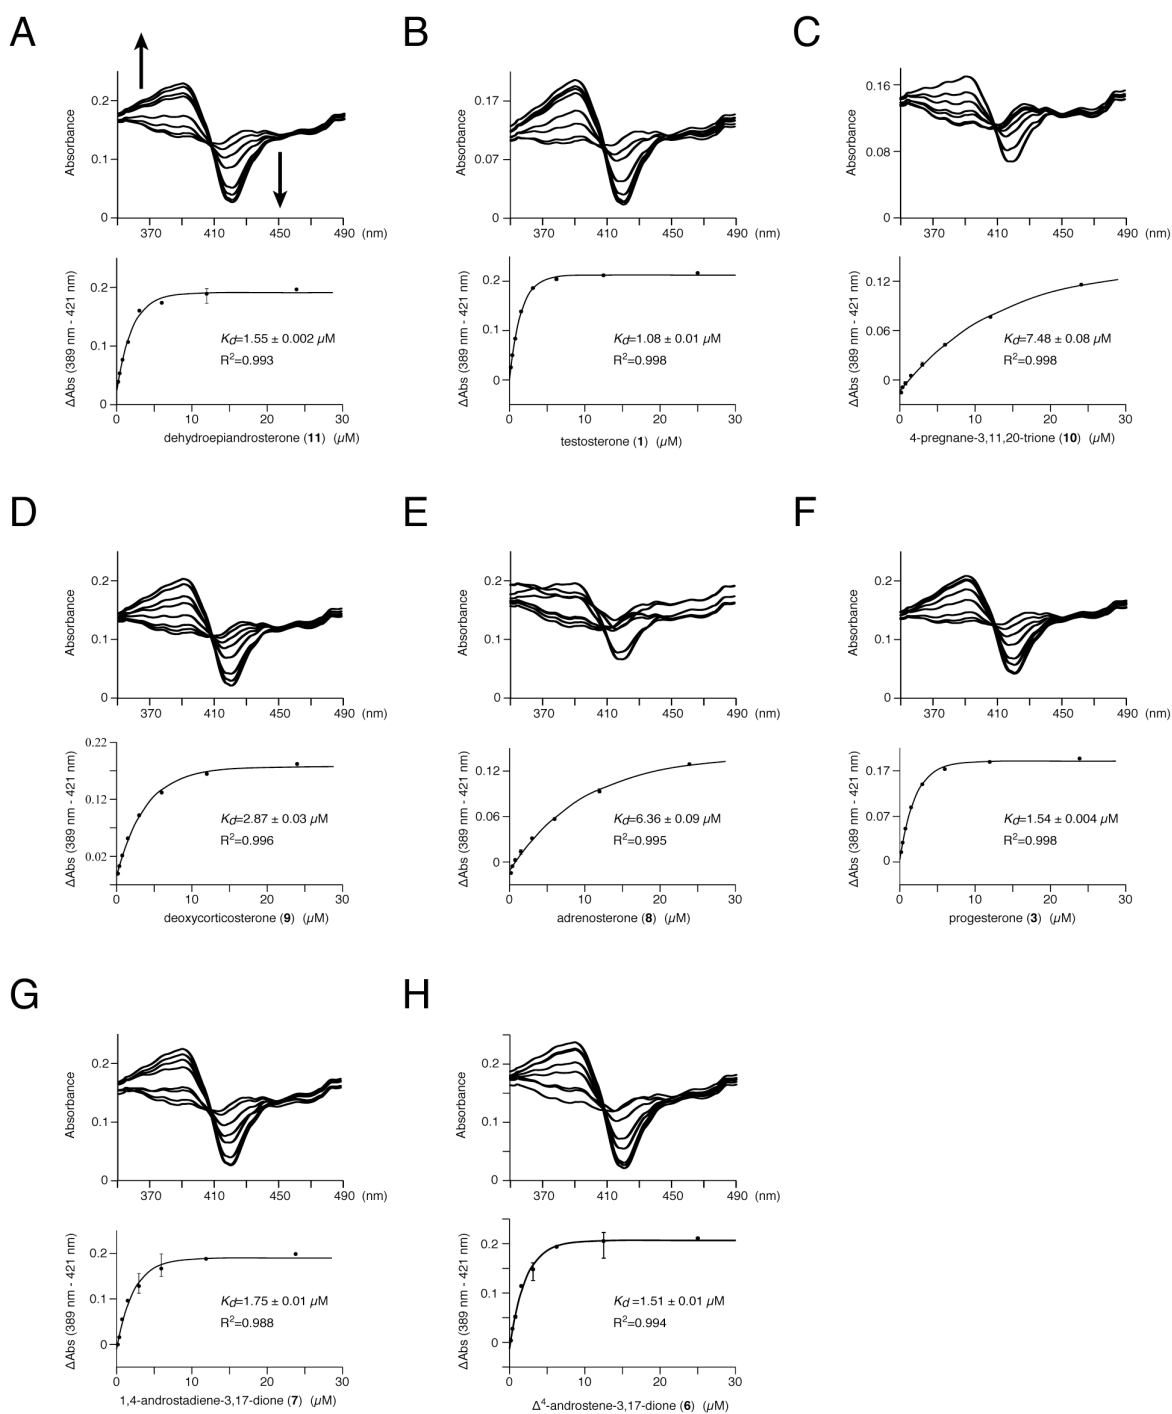

**FIGURE S1.** Equilibrium dissociation constants between CYP154C3 and the substrates. Each upper panel shows the shift of the spin state of the heme (type I spectral shift) induced by the binding between CYP154C3 and a steroid compound (final concentrations [ $\mu\text{M}$ ] are 0, 0.195, 0.391, 0.781, 1.56, 3.13, 6.25, 12.5 and 25.0). The shift accompanied by the increasing substrate concentrations is indicated by arrows in panel A as a representative. Each lower panel shows a plot of the peak-to-trough absorbance against the corresponding concentrations of the steroid. The equilibrium dissociation constant (apparent  $K_d$  value) was calculated from this plot. Equilibrium dissociation constants between CYP154C3 and dehydroepiandrosterone (**11**) (A), testosterone (**1**) (B), 4-pregnane-3,11,20-trione (**10**) (C), deoxycorticosterone (**9**) (D), adrenosterone (**8**) (E), progesterone (**3**) (F), 1,4-androstadiene-3,17-dione (**7**) (G), and  $\Delta^4$ -androstene-3,17-dione (**6**) (H) were determined.

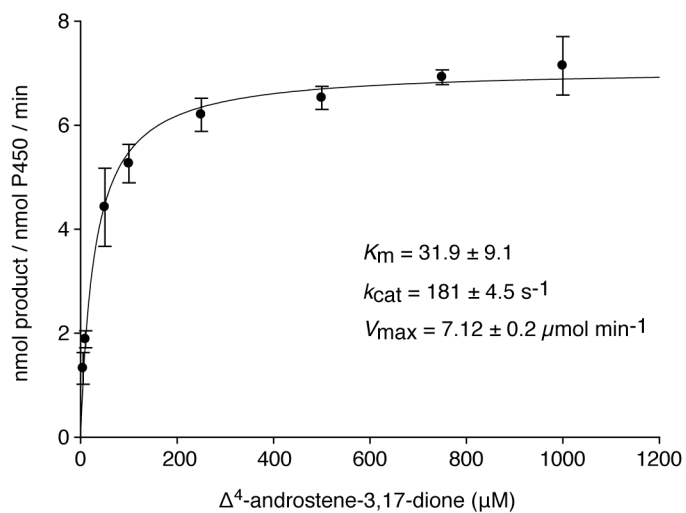

**FIGURE S2.** Determination of kinetic parameters of the CYP154C3-catalyzed hydroxylation of  $\Delta^4$ -androstene-3,17-dione (**6**). The vertical and horizontal axes show the initial velocity of the reaction and concentration of the substrate, respectively. Values indicate the mean of four independent experiments with standard deviations.

**Table S1.** Spectroscopic data of 16 $\alpha$ -hydroxytestosterone (in methanol- $d_4$ )<sup>a</sup>. The yield of 16 $\alpha$ -hydroxytestosterone was 36.7 mg. HREI-MS: calculated for C<sub>19</sub>H<sub>27</sub>O<sub>3</sub> [M-H<sup>+</sup>]<sup>-</sup>, 303.19602; found 303.19684.

| no.                      | $\delta_c$ , mult. <sup>b</sup> | $\delta_H$ (J in Hz)                   | COSY                                                | HMBC <sup>c</sup>     | NOESY <sup>d</sup>                                     |
|--------------------------|---------------------------------|----------------------------------------|-----------------------------------------------------|-----------------------|--------------------------------------------------------|
| 1 $\alpha$               | 36.69, CH <sub>2</sub>          | 1.65, m, 2H                            | 1 $\beta$ , 2 $\alpha$ , 2 $\beta$                  | 2, 9, 10, 19          | 1 $\beta$ , 2 $\alpha$ , 9                             |
| 1 $\beta$                | 36.69, CH <sub>2</sub>          | 2.07, m, 2H                            | 1 $\alpha$ , 2 $\beta$                              | 2, 3, 5               | 1 $\alpha$ , 2 $\alpha$ , 2 $\beta$ , 11 $\alpha$ , 19 |
| 2 $\alpha$               | 33.82, CH <sub>2</sub>          | 2.34, m, 2H                            | 1 $\alpha$ , 2 $\beta$                              | 10                    | 1 $\alpha$ , 1 $\beta$ , 2 $\beta$                     |
| 2 $\beta$                | 35.82, CH <sub>2</sub>          | 2.47, m, 2H                            | 1 $\alpha$ , 1 $\beta$                              | 1, 3, 4, 10           | 1 $\beta$ , 2 $\alpha$ , 19                            |
| 3                        | 202.28, C                       | —                                      | —                                                   | —                     | —                                                      |
| 4                        | 124.20, CH                      | 5.69, s, 1H                            | —                                                   | 2, 6, 10              | 6 $\alpha$                                             |
| 5                        | 175.00, C                       | —                                      | —                                                   | —                     | —                                                      |
| 6 $\alpha$               | 34.69, CH <sub>2</sub>          | 2.34, m, 2H                            | 7 $\alpha$ , 6 $\beta$                              | 8, 10                 | 4, 6 $\beta$ , 9                                       |
| 6 $\beta$                | 34.69, CH <sub>2</sub>          | 2.47, m, 2H                            | 6 $\alpha$ , 7 $\beta$                              | 4, 7, 8, 10           | 6 $\alpha$ , 7 $\beta$ , 19                            |
| 7 $\alpha$               | 32.82, CH <sub>2</sub>          | 1.00, m, 2H                            | 6 $\alpha$ , 6 $\beta$ , 7 $\beta$ , 8 $\beta$      | 8                     | 6 $\beta$ , 17 $\alpha$                                |
| 7 $\beta$                | 32.82, CH <sub>2</sub>          | 1.81, m, 2H                            | 6 $\beta$ , 7 $\alpha$ ,                            | 8                     | 6 $\beta$ , 7 $\alpha$                                 |
| 8                        | 36.38, CH                       | 1.65, m, 1H                            | 9 $\alpha$ , 7 $\alpha$ , 7 $\beta$ , 14            | —                     | 7 $\beta$ , 18, 19                                     |
| 9                        | 55.42, CH                       | 1.00, m, 1H                            | 8, 11 $\beta$ , 11 $\alpha$                         | 8, 10                 | 1 $\alpha$ , 14 $\alpha$ ,                             |
| 10                       | 40.04, C                        | —                                      | —                                                   | —                     | —                                                      |
| 11 $\alpha$              | 21.33, CH <sub>2</sub>          | 1.65, m, 2H                            | 11 $\beta$ , 12 $\alpha$                            | —                     | 1 $\beta$ , 12 $\alpha$ , 18, 19                       |
| 11 $\beta$               | 21.33, CH <sub>2</sub>          | 1.48, m, 2H                            | 9 $\alpha$ , 11 $\alpha$ , 12 $\alpha$ , 12 $\beta$ | 9, 12, 13             | 11 $\alpha$ , 18, 19                                   |
| 12 $\alpha$              | 37.72, CH <sub>2</sub>          | 1.17, dt, 2H<br>(13.0, 4.0)            | 11 $\beta$ , 11 $\alpha$ , 12 $\beta$               | 13, 14, 17, 18        | 12 $\beta$ , 17 $\alpha$                               |
| 12 $\beta$               | 37.72, CH <sub>2</sub>          | 1.81, m, 2H                            | 12 $\alpha$                                         | 14, 17                | 11 $\alpha$ , 12 $\alpha$ , 18                         |
| 13                       | 44.55, C                        | —                                      | —                                                   | —                     | —                                                      |
| 14                       | 49.51, CH                       | 1.31, ddd, 1H<br>(18.5, 7.5, 3.0)      | 8 $\beta$ , 15 $\alpha$ , 15 $\beta$                | 9, 8, 13, 15, 17      | 9, 15 $\beta$ , 17 $\alpha$                            |
| 15 $\alpha$              | 35.08, CH <sub>2</sub>          | 1.79, d, 2H (4)                        | 14 $\alpha$ , 15 $\beta$ , 16 $\beta$               | 8, 14, 16, 17         | 15 $\beta$ , 16 $\beta$                                |
| 15 $\beta$               | 35.08, CH <sub>2</sub>          | 1.81, m, 2H                            | 14 $\alpha$                                         | 13, 14, 16, 17        | 15 $\alpha$                                            |
| 16 $\beta$               | 78.60, CH                       | 4.01, dddd, 1H<br>(8.0, 8.0, 5.5, 2.0) | 15 $\alpha$ , 17 $\alpha$                           | 14, 17                | 15 $\alpha$ , 18                                       |
| 17 $\alpha$              | 90.36, CH                       | 3.37, d, 1H (6.0)                      | 16 $\beta$                                          | 12, 13, 16, 18,       | 12 $\alpha$ , 14 $\alpha$                              |
| 18<br>(CH <sub>3</sub> ) | 12.73, CH <sub>3</sub>          | 0.79, s, 3H                            | —                                                   | 12, 13, 14, 17,<br>18 | 8, 11 $\beta$ , 12 $\beta$ , 16 $\beta$ ,<br>19        |
| 19<br>(CH <sub>3</sub> ) | 17.69, CH <sub>3</sub>          | 1.22, s, 3H                            | —                                                   | 1, 5, 9, 10, 19       | 1 $\beta$ , 2 $\beta$ , 8, 11 $\beta$ , 18             |
| 16-OH                    | —                               | —                                      | —                                                   | —                     | —                                                      |
| 17-OH                    | —                               | —                                      | —                                                   | —                     | —                                                      |

<sup>a</sup>500 MHz for <sup>1</sup>H NMR and 125.65 MHz for <sup>13</sup>C NMR. <sup>b</sup>Numbers of attached protons were determined by analysis of 2D spectra. <sup>c</sup>HMBC correlations are from the started protons to the indicated carbons. <sup>d</sup>NOESY correlations are from the started protons to the indicated protons.

**Table S2.** Spectroscopic data of 16 $\alpha$ -hydroxyprogesterone (in methanol- $d_4$ )<sup>a</sup>. The yield of 16 $\alpha$ -hydroxyprogesterone was 67.1 mg. HREI-MS: calculated for C<sub>21</sub>H<sub>29</sub>O<sub>3</sub> [M-H<sup>+</sup>], 329.21167; found 329.21189.

| no.                   | $\delta_c$ , mult. <sup>b</sup> | $\delta_H$ ( $J$ in Hz)             | COSY                      | HMBC <sup>c</sup>      | NOESY <sup>d</sup>                  |
|-----------------------|---------------------------------|-------------------------------------|---------------------------|------------------------|-------------------------------------|
| 1 $\alpha$            | 36.81, CH <sub>2</sub>          | 1.71, m, 2H                         | 1 $\beta$ , 2 $\beta$     | 2, 9, 10, 19           | 1 $\beta$ , 2 $\alpha$              |
| 1 $\beta$             | 36.81, CH <sub>2</sub>          | 2.09, m, 2H                         | 1 $\alpha$                | 2, 3, 5, 10, 19        | 2 $\alpha$ , 2 $\beta$ , 19         |
| 2 $\alpha$            | 33.94, CH <sub>2</sub>          | 2.31, m, 2H                         | 1 $\alpha$                | 1, 3, 10               | 1 $\alpha$                          |
| 2 $\beta$             | 33.94, CH <sub>2</sub>          | 2.50, m, 2H                         | 1 $\alpha$ , 1 $\beta$    | 1, 3, 10               | 19, 2 $\alpha$                      |
| 3                     | 202.37, C                       | —                                   | —                         | —                      | —                                   |
| 4                     | 124.41, C                       | 5.72, s, 1H                         | —                         | 2, 4, 10               | 6 $\alpha$                          |
| 5                     | 174.87, C                       | —                                   | —                         | —                      | —                                   |
| 6 $\alpha$            | 34.82, CH <sub>2</sub>          | 2.28, m, 2H                         | 6 $\beta$                 | 4, 5, 7, 8, 10         | 4, 7 $\alpha$                       |
| 6 $\beta$             | 34.82, CH <sub>2</sub>          | 2.47, m, 2H                         | 7 $\alpha$ , 7 $\beta$    | 4, 5, 7, 8             | 6 $\alpha$ , 7 $\beta$ , 19         |
| 7 $\alpha$            | 32.28, CH <sub>2</sub>          | 1.09, m, 2H                         | 6 $\beta$ , 7 $\beta$ , 8 | 9                      | 6 $\alpha$ , 7 $\beta$              |
| 7 $\beta$             | 32.28, CH <sub>2</sub>          | 1.87, m, 2H                         | 7 $\alpha$                | 4, 8, 9, 14, 15        | 6 $\alpha$ , 6 $\beta$ , 7 $\alpha$ |
| 8                     | 36.54, CH                       | 1.64, m, 1H                         | 9                         | 9                      | 19                                  |
| 9                     | 55.10, CH                       | 1.09, m, 1H                         | 8, 11 $\beta$             | 7, 8, 10, 11, 14, 19   | 1 $\alpha$ , 14                     |
| 10                    | 40.10, C                        | —                                   | —                         | —                      | —                                   |
| 11 $\alpha$           | 21.92, CH <sub>2</sub>          | 1.67, m, 2H                         | 9                         | 12                     | 11 $\beta$                          |
| 11 $\beta$            | 21.92, CH <sub>2</sub>          | 1.49, dq, 2H (13.0, 3.5)            | 9, 11 $\alpha$            | 8, 9, 10, 11, 12       | 12 $\beta$ , 18                     |
| 12 $\alpha$           | 39.92, CH <sub>2</sub>          | 1.59, m, 2H                         | 12 $\beta$                | 11, 13, 18             | 12 $\beta$                          |
| 12 $\beta$            | 39.92, CH <sub>2</sub>          | 2.02, m, 2H                         | 11 $\beta$                | 9, 11, 14, 18          | 18                                  |
| 13                    | 46.26, C                        | —                                   | —                         | —                      | —                                   |
| 14                    | 55.20, CH                       | 1.60, m, 1H                         | —                         | 8, 12, 13, 18          | 9, 17 $\alpha$                      |
| 15 $\alpha$           | 36.54, CH <sub>2</sub>          | 1.77, m, 2H                         | 15 $\beta$ , 16 $\beta$   | 8, 13, 14              | 14, 15 $\beta$ , 16 $\beta$ , 18    |
| 15 $\beta$            | 36.54, CH <sub>2</sub>          | 1.60, m, 2H                         | 15 $\alpha$               | 8, 13                  | 15 $\alpha$ , 18                    |
| 16 $\beta$            | 72.94, CH                       | 4.72, dddd, 1H (7.0, 7.0, 4.2, 1.5) | 15 $\alpha$ , 17 $\alpha$ | 14, 16, 17, 20         | 17 $\alpha$ , 15 $\alpha$ , 18      |
| 17 $\alpha$           | 74.62, CH                       | 2.56, d, 1H (6.5)                   | 16 $\beta$                | 12, 13, 14, 17, 18, 20 | 14, 16 $\beta$                      |
| 18 (CH <sub>3</sub> ) | 14.97, CH <sub>3</sub>          | 0.68, s, 3H                         | —                         | 12, 13, 14, 17, 18     | 15 $\beta$                          |
| 19 (CH <sub>3</sub> ) | 17.78, CH <sub>3</sub>          | 1.23, s, 3H                         | —                         | 1, 5, 9, 10, 19        | 6 $\beta$                           |
| 20                    | 210.77, C                       | —                                   | —                         | —                      | —                                   |
| 21 (CH <sub>3</sub> ) | 33.22, CH <sub>3</sub>          | 2.17, s, 3H                         | —                         | 17, 20, 21             | 12 $\beta$ , 17 $\alpha$ , 18       |
| 16-OH                 | —                               | —                                   | —                         | —                      | —                                   |

<sup>a</sup>500 MHz for <sup>1</sup>H NMR and 125.65 MHz for <sup>13</sup>C NMR. <sup>b</sup>Numbers of attached protons were determined by analysis of 2D spectra. <sup>c</sup>HMBC correlations are from the started protons to the indicated carbons. <sup>d</sup>NOESY correlations are from the started protons to the indicated protons.

**Table S3.** Spectroscopic data of 16 $\alpha$ -hydroxy- $\Delta^4$ -androstene-3,17-dione (in chloroform- $d_4$ )<sup>a</sup>. The yield of 16 $\alpha$ -hydroxy- $\Delta^4$ -androstene-3,17-dione was 40.2 mg. HREI-MS: calculated for C<sub>19</sub>H<sub>25</sub>O<sub>3</sub> [M-H<sup>+</sup>], 301.18037; found 301.18119.

| no.                   | $\delta_c$ , mult. <sup>b</sup> | $\delta_H$ ( $J$ in Hz)     | gDQCOSY                                     | gHMBC <sup>c</sup>             | NOESY <sup>d</sup>            |
|-----------------------|---------------------------------|-----------------------------|---------------------------------------------|--------------------------------|-------------------------------|
| 1 $\alpha$            | 35.80, CH <sub>2</sub>          | 1.71, m, 2H                 | 1 $\beta$ , 2 $\alpha$ , 2 $\beta$          | 2, 3, 5, 10, 19                | 1 $\beta$                     |
| 1 $\beta$             | 35.80, CH <sub>2</sub>          | 2.03, m, 2H                 | 1 $\alpha$ , 2 $\alpha$ , 2 $\beta$         | 1, 2, 3, 5, 10, 19             | 1 $\alpha$ , 2 $\beta$        |
| 2 $\alpha$            | 34.05, CH <sub>2</sub>          | 2.42, m, 2H                 | 1 $\alpha$ , 1 $\beta$                      | 1, 3, 10                       | —                             |
| 2 $\beta$             | 34.05, CH <sub>2</sub>          | 2.34, m, 2H                 | 1 $\alpha$ , 1 $\beta$                      | 1, 3                           | 1 $\alpha$ , 1 $\beta$        |
| 3                     | 199.49, C                       | —                           | —                                           | —                              | —                             |
| 4                     | 124.42, CH                      | 5.75, s, 1H                 | —                                           | 2, 3, 4, 5, 6, 10              | 6 $\beta$                     |
| 5                     | 170.26, C                       | —                           | —                                           | —                              | —                             |
| 6 $\alpha$            | 32.65, CH <sub>2</sub>          | 2.42, m, 2H                 | 7 $\alpha$ , 7 $\beta$                      | 4, 5, 6, 7, 8, 10              | 6 $\beta$ , 19                |
| 6 $\beta$             | 32.65, CH <sub>2</sub>          | 2.32, m, 2H                 | 7 $\alpha$ , 7 $\beta$                      | 4, 5, 6, 7, 8, 10              | 7 $\alpha$                    |
| 7 $\alpha$            | 30.56, CH <sub>2</sub>          | 1.92, m, 2H                 | 7 $\beta$ , 6 $\alpha$ , 6 $\beta$          | 5, 6, 8, 9, 14                 | 9, 14                         |
| 7 $\beta$             | 30.56, CH <sub>2</sub>          | 1.11, dt, 2H<br>(13.0, 4.0) | 6 $\alpha$ , 6 $\beta$ , 7 $\alpha$ , 8     | 5, 6, 8, 14                    | 7 $\alpha$                    |
| 8                     | 35.25, CH                       | 1.70, m, 1H                 | 7 $\alpha$ , 7 $\beta$ , 9, 14              | 6, 9, 10, 11, 13               | 18, 19                        |
| 9                     | 53.83, CH                       | 1.01, m, 1H                 | 8, 11 $\beta$                               | 5, 7, 8, 11, 19                | 14                            |
| 10                    | 38.78, C                        | —                           | —                                           | —                              | —                             |
| 11 $\alpha$           | 31.24, CH <sub>2</sub>          | 1.85, m, 2H                 | 9, 11 $\beta$ , 12 $\alpha$ ,<br>12 $\beta$ | 9, 12, 13                      | —                             |
| 11 $\beta$            | 31.24, CH <sub>2</sub>          | 1.37, m, 2H                 | 9, 11 $\alpha$ , 12 $\alpha$                | 9, 11, 12, 13                  | 9, 11 $\alpha$ , 12 $\alpha$  |
| 12 $\alpha$           | 20.09, CH <sub>2</sub>          | 1.68, m, 2H                 | 11 $\alpha$ , 11 $\beta$ , 12 $\beta$       | 11, 14                         | 12 $\beta$                    |
| 12 $\beta$            | 20.09, CH <sub>2</sub>          | 1.44, m, 2H                 | 11 $\alpha$ , 12 $\alpha$                   | 9, 14                          | 12 $\alpha$ , 11 $\beta$ , 18 |
| 13                    | 47.59, C                        | —                           | —                                           | —                              | —                             |
| 14                    | 47.93, CH                       | 1.52, m, 1H                 | 8, 15 $\alpha$ , 15 $\beta$                 | 7, 8, 9, 12, 13, 15, 17,<br>18 | 7 $\alpha$ , 9                |
| 15 $\alpha$           | 30.71, CH <sub>2</sub>          | 1.89, m, 2H                 | 14, 15 $\beta$                              | 13, 16, 17                     | 15 $\beta$                    |
| 15 $\beta$            | 30.71, CH <sub>2</sub>          | 1.99, m, 2H                 | 14, 15 $\alpha$ , 16 $\beta$                | 8, 13, 14, 15, 16, 17          | 15 $\alpha$ , 16 $\beta$      |
| 16 $\beta$            | 71.36, CH                       | 4.38, d, 1H<br>(8.0)        | —                                           | 14, 15, 17                     | 15 $\beta$ , 18               |
| 17                    | 218.92, C                       | —                           | —                                           | —                              | —                             |
| 18 (CH <sub>3</sub> ) | 14.21, CH <sub>3</sub>          | 1.01, s, 3H                 | —                                           | 10, 12, 14, 17, 18             | 8                             |
| 19 (CH <sub>3</sub> ) | 17.55, CH <sub>3</sub>          | 1.21, s, 3H                 | —                                           | 1, 5, 9, 10, 19                | —                             |
| 16-OH                 | —                               | —                           | —                                           | —                              | —                             |
| 17-OH                 | —                               | —                           | —                                           | —                              | —                             |

<sup>a</sup>500 MHz for <sup>1</sup>H NMR and 125.65 MHz for <sup>13</sup>C NMR. <sup>b</sup>Numbers of attached protons were determined by analysis of 2D spectra. <sup>c</sup>gHMBC correlations are from the started protons to the indicated carbons. <sup>d</sup>NOESY correlations are from the started protons to the indicated protons.

**Table S4.** Spectroscopic data of 16 $\alpha$ -hydroxyadrenosterone (in methanol- $d_4$ )<sup>a</sup>. The yield of 16 $\alpha$ -hydroxyadrenosterone was 21.4 mg. HREI-MS: calculated for C<sub>19</sub>H<sub>24</sub>O<sub>3</sub> [M-H<sup>+</sup>], 315.15963; found 315.16045.

| no.                   | $\delta_c$ , mult. <sup>b</sup> | $\delta_H$ ( $J$ in Hz) | COSY                                | HMBC <sup>c</sup> | NOESY <sup>d</sup>           |
|-----------------------|---------------------------------|-------------------------|-------------------------------------|-------------------|------------------------------|
| 1 $\alpha$            | 34.59, CH <sub>2</sub>          | 2.52, m, 2H             | 1 $\beta$                           | 3                 | 1 $\beta$                    |
| 1 $\beta$             | 34.59, CH <sub>2</sub>          | 2.24, m, 2H             | 1 $\alpha$ , 2 $\beta$              | —                 | —                            |
| 2 $\alpha$            | 33.51, CH <sub>2</sub>          | 2.31, m, 2H             | 2 $\beta$                           | —                 | —                            |
| 2 $\beta$             | 33.51, CH <sub>2</sub>          | 2.49, m, 2H             | 1 $\beta$ , 2 $\alpha$              | 3                 | 1 $\beta$ , 2 $\alpha$       |
| 3                     | 202.53, C                       | —                       | —                                   | —                 | —                            |
| 4                     | 125.05, CH                      | 5.73, s, 1H             | —                                   | 4, 6              | 6 $\beta$                    |
| 5                     | 172.52, C                       | —                       | —                                   | —                 | —                            |
| 6 $\alpha$            | 33.31, CH <sub>2</sub>          | 2.37, m, 2H             | 6 $\beta$ , 7 $\alpha$ , 7 $\beta$  | —                 | 6 $\beta$ , 7 $\alpha$       |
| 6 $\beta$             | 33.31, CH <sub>2</sub>          | 2.53, m, 2H             | 6 $\alpha$ , 7 $\alpha$ , 7 $\beta$ | 4, 5, 7, 8        | 6 $\alpha$ , 19              |
| 7 $\alpha$            | 31.95, CH <sub>2</sub>          | 2.10, m, 2H             | 6 $\alpha$ , 6 $\alpha$ , 7 $\beta$ | 5, 6, 9, 14       | 7 $\beta$                    |
| 7 $\beta$             | 31.95, CH <sub>2</sub>          | 1.32, m, 2H             | 6 $\alpha$ , 6 $\beta$ , 7 $\alpha$ | —                 | 1, 7 $\alpha$ , 15 $\beta$   |
| 8                     | 35.62, CH                       | 2.72, m, 1H             | 9, 14                               | 13                | 19                           |
| 9                     | 64.22, CH                       | 2.19, m, 1H             | 8                                   | 11, 14, 19        | —                            |
| 10                    | 35.69, C                        | —                       | —                                   | —                 | —                            |
| 11                    | 209.89, C                       | —                       | —                                   | —                 | —                            |
| 12 $\alpha$           | 51.47, CH <sub>2</sub>          | 2.50, m, 2H             | —                                   | 11, 12, 18        | 12 $\beta$                   |
| 12 $\beta$            | 51.47, CH <sub>2</sub>          | 2.31, m, 2H             | —                                   | 9, 11, 17, 18     | 12 $\alpha$ , 18             |
| 13                    | 39.82, C                        | —                       | —                                   | —                 | —                            |
| 14                    | 37.69, CH                       | 2.18, m, 1H             | 8                                   | 13, 15, 18        | —                            |
| 15 $\alpha$           | 32.47, CH <sub>2</sub>          | 1.94, m, 2H             | 15 $\beta$ , 16 $\beta$             | 16, 17            | 15 $\beta$                   |
| 15 $\beta$            | 32.47, CH <sub>2</sub>          | 2.19, m, 2H             | 15 $\alpha$ , 16 $\beta$            | —                 | 7 $\beta$ , 15 $\alpha$ , 18 |
| 16 $\beta$            | 72.57, CH                       | 4.40, d, 1H<br>(8.0)    | 15 $\alpha$ , 15 $\beta$            | 15, 17            | 15 $\beta$ , 18              |
| 17                    | 217.59, C                       | —                       | —                                   | —                 | —                            |
| 18 (CH <sub>3</sub> ) | 15.53, CH <sub>3</sub>          | 0.91, s, 3H             | —                                   | 12, 17, 18        | 15 $\beta$                   |
| 19 (CH <sub>3</sub> ) | 17.79, CH <sub>3</sub>          | 1.45, s, 3H             | —                                   | 5, 9, 10, 19      | —                            |
| 16-OH                 | 72.57, CH                       | —                       | —                                   | —                 | —                            |

<sup>a</sup>500 MHz for <sup>1</sup>H NMR and 125.65 MHz for <sup>13</sup>C NMR. <sup>b</sup>Numbers of attached protons were determined by analysis of 2D spectra. <sup>c</sup>HMBC correlations are from the started protons to the indicated carbons. <sup>d</sup>NOESY correlations are from the started protons to the indicated protons.

**Table S5.** Spectroscopic data of 16 $\alpha$ -hydroxy-1,4-androstadione-3,17-dione (in chloroform- $d_4$ )<sup>a</sup>. The yield of 16 $\alpha$ -hydroxy-1,4-androstadione-3,17-dione was 38.0 mg. HREI-MS: calculated for C<sub>19</sub>H<sub>23</sub>O<sub>3</sub> [M-H<sup>+</sup>]<sup>-</sup>, 229.16472; found 229.16450.

| no.                   | $\delta_c$ , mult. <sup>b</sup> | $\delta_H$ ( $J$ in Hz)         | gDQCOSY                                | gHMBC <sup>c</sup>    | NOESY <sup>d</sup>                      |
|-----------------------|---------------------------------|---------------------------------|----------------------------------------|-----------------------|-----------------------------------------|
| 1                     | 155.24, CH                      | 7.04, d, 1H (10.0)              | 2                                      | 1, 2, 3, 5, 9, 10, 19 | 2, 11 $\alpha$ , 19                     |
| 2                     | 128.01, CH                      | 6.25, dd, 1H (10.5, 2.5)        | 1                                      | 2, 4, 10              | 1                                       |
| 3                     | 186.36, C                       | —                               | —                                      | —                     | —                                       |
| 4                     | 124.43, CH                      | 6.09, s, 1H                     | —                                      | 2, 6, 10              | 6 $\alpha$                              |
| 5                     | 168.20, C                       | —                               | —                                      | —                     | —                                       |
| 6 $\alpha$            | 32.65, CH <sub>2</sub>          | 2.42, m, 2H                     | 7 $\alpha$ , 7 $\beta$                 | 4, 5, 7, 8, 10        | 4, 6 $\beta$ , 7 $\alpha$               |
| 6 $\beta$             | 32.65, CH <sub>2</sub>          | 2.50, dt, 2H (13.5, 5.0)        | 7 $\alpha$ , 7 $\beta$                 | 4, 5, 7, 8, 10        | 6 $\alpha$ , 19                         |
| 7 $\alpha$            | 32.14, CH <sub>2</sub>          | 2.03, m, 2H                     | 6 $\alpha$ , 6 $\beta$ , 7 $\beta$ , 8 | 5, 6, 8, 9            | 6 $\alpha$ , 7 $\beta$                  |
| 7 $\beta$             | 32.14, CH <sub>2</sub>          | 1.13, m, 2H                     | 6 $\alpha$ , 6 $\beta$ , 7 $\alpha$    | 5, 8, 9, 14           | 7 $\alpha$ , 18                         |
| 8                     | 35.22, CH                       | 1.80, dt, 1H (11.5, 4.0)        | 7 $\alpha$ , 9, 14                     | 6, 9, 14              | 18, 19                                  |
| 9                     | 52.24, CH                       | 1.13, m, 1H                     | 8, 11 $\alpha$ , 11 $\beta$            | 1, 8, 10, 11, 14, 19  | 14                                      |
| 10                    | 43.53, C                        | —                               | —                                      | —                     | —                                       |
| 11 $\alpha$           | 21.89, CH <sub>2</sub>          | 1.86, m, 2H                     | 9, 11 $\beta$ , 12 $\alpha$            | 8, 9, 10              | 1, 11 $\beta$                           |
| 11 $\beta$            | 21.89, CH <sub>2</sub>          | 1.69, m, 2H                     | 12 $\alpha$ , 12 $\beta$ , 11 $\alpha$ | 8, 9, 10, 13          | 11 $\alpha$ , 18, 19                    |
| 12 $\alpha$           | 31.18, CH <sub>2</sub>          | 1.39, dt, 2H (13.0, 2.0)        | 11 $\alpha$ , 11 $\beta$ , 12 $\beta$  | 9, 11, 13, 17, 18     | 12 $\beta$                              |
| 12 $\beta$            | 31.18, CH <sub>2</sub>          | 1.86, m, 2H                     | 11 $\beta$ , 12 $\alpha$               | 11, 14, 18            | 12 $\alpha$ , 18                        |
| 13                    | 47.77, C                        | —                               | —                                      | —                     | —                                       |
| 14                    | 47.56, CH                       | 1.52, ddd, 1H (13.0, 11.5, 7.0) | 8, 15 $\alpha$ , 15 $\beta$            | 8, 9, 12, 13, 17, 18  | 7 $\alpha$ , 9, 15 $\alpha$             |
| 15 $\alpha$           | 30.87, CH <sub>2</sub>          | 1.88, m, 2H                     | 14, 15 $\beta$                         | 13, 14, 16, 17        | 14, 18                                  |
| 15 $\beta$            | 30.87, CH <sub>2</sub>          | 2.01, m, 2H                     | 14, 15 $\alpha$                        | 14, 16, 17            | 15 $\alpha$ , 16 $\beta$                |
| 16 $\beta$            | 71.25, CH                       | 4.39, d, 1H                     | 15 $\alpha$ , 15 $\beta$               | 14, 15, 16, 17, 18    | 15 $\beta$ , 18                         |
| 17                    | 218.49, C                       | —                               | —                                      | —                     | —                                       |
| 18 (CH <sub>3</sub> ) | 14.31, CH <sub>3</sub>          | 1.04, s, 3H                     | —                                      | 12, 13, 14, 17        | 8, 11 $\beta$ , 15 $\beta$ , 16 $\beta$ |
| 19 (CH <sub>3</sub> ) | 18.94, CH <sub>3</sub>          | 1.25, s, 3H                     | —                                      | 1, 5, 9, 10           | 1, 6 $\beta$ , 8, 11 $\beta$            |
| 16-OH                 | —                               | —                               | —                                      | —                     | —                                       |

<sup>a</sup>500 MHz for <sup>1</sup>H NMR and 125.65 MHz for <sup>13</sup>C NMR. <sup>b</sup>Numbers of attached protons were determined by analysis of 2D spectra. <sup>c</sup>gHMBC correlations are from the started protons to the indicated carbons. <sup>d</sup>NOESY correlations are from the started protons to the indicated protons.

**Table S6.** Spectroscopic data of 16 $\alpha$ -hydroxydehydroepiandrosterone (in chloroform- $d_4$ )<sup>a</sup>. The yield of 16 $\alpha$ -hydroxydehydroepiandrosterone was 38.0 mg. HREI-MS: calculated for C<sub>19</sub>H<sub>27</sub>O<sub>3</sub> [M-H<sup>+</sup>], 303.19602; found 303.19484.

| no.                   | $\delta_c$ , mult. <sup>b</sup> | $\delta_H$ ( $J$ in Hz)           | COSY                                            | HMBC <sup>c</sup> | NOESY <sup>d</sup>                         |
|-----------------------|---------------------------------|-----------------------------------|-------------------------------------------------|-------------------|--------------------------------------------|
| 1 $\alpha$            | 37.28, CH <sub>2</sub>          | 1.10, m, 2H                       | 2 $\alpha$ , 2 $\beta$                          | 2, 3, 9, 10, 19   | 2 $\alpha$                                 |
| 1 $\beta$             | 37.28, CH <sub>2</sub>          | 1.86, m, 2H                       | 2 $\beta$                                       | 2, 3, 5, 9        | 1 $\alpha$ , 2 $\beta$                     |
| 2 $\alpha$            | 31.40, CH <sub>2</sub>          | 1.83, m, 2H                       | 1 $\beta$                                       | 3, 10             | —                                          |
| 2 $\beta$             | 31.40, CH <sub>2</sub>          | 1.50, m, 2H                       | 1 $\alpha$                                      | 1                 | 19                                         |
| 3 $\beta$             | 71.78, CH                       | 3.54, ddt, 1H<br>(11.5, 4.5, 4.5) | 2 $\alpha$ , 2 $\beta$ , 4 $\alpha$ , 4 $\beta$ | —                 | 1 $\beta$ , 4 $\beta$                      |
| 4 $\alpha$            | 42.34, CH <sub>2</sub>          | 2.25, m, 2H                       | 4 $\beta$                                       | 2, 3, 5, 6        | 4 $\beta$ , 19                             |
| 4 $\beta$             | 42.34, CH <sub>2</sub>          | 2.33, m, 2H                       | 4 $\alpha$                                      | 2, 3, 5, 6        | 4 $\alpha$ , 6                             |
| 5                     | 141.07, C                       | —                                 | —                                               | —                 | —                                          |
| 6                     | 121.07, C                       | 5.38, m, 1H                       | 7 $\alpha$ , 7 $\beta$                          | 6, 7, 8, 10, 14   | 4 $\beta$ , 7 $\alpha$ , 7 $\beta$         |
| 7 $\alpha$            | 30.78, CH <sub>2</sub>          | 1.65, m, 2H                       | —                                               | 4, 5, 6, 9        | 6, 14                                      |
| 7 $\beta$             | 30.78, CH <sub>2</sub>          | 2.08, m, 2H                       | 8                                               | 5, 6, 9           | 6, 8                                       |
| 8                     | 31.69, CH                       | 1.65, m, 1H                       | 7 $\beta$ , 9, 11 $\alpha$                      | 6, 7              | 7 $\beta$ , 18, 19                         |
| 9                     | 50.30, CH                       | 1.02, m, 1H                       | 1 $\alpha$ , 8, 11 $\beta$                      | —                 | —                                          |
| 10                    | 36.80, C                        | —                                 | —                                               | —                 | —                                          |
| 11 $\alpha$           | 20.16, CH <sub>2</sub>          | 1.49, m, 2H                       | 9, 11 $\beta$ , 12 $\alpha$ , 12 $\beta$        | 12, 13            | 9, 18, 11 $\beta$ , 12 $\beta$             |
| 11 $\beta$            | 20.16, CH <sub>2</sub>          | 1.67, m, 2H                       | 9, 11 $\alpha$ , 12 $\alpha$ , 12 $\beta$       | 9, 11             | 11 $\beta$ , 12 $\alpha$ , 12 $\beta$ , 19 |
| 12 $\alpha$           | 31.40, CH <sub>2</sub>          | 1.39, dt, 2H<br>(13.0, 4.0)       | 11 $\alpha$ , 11 $\beta$ , 12 $\beta$           | 11, 12, 13, 18    | 12 $\beta$                                 |
| 12 $\beta$            | 31.40, CH <sub>2</sub>          | 1.85, m, 2H                       | 11 $\alpha$ , 11 $\beta$ , 12 $\alpha$          | 9, 12, 13, 14     | 11 $\beta$ , 12 $\alpha$ , 18              |
| 13                    | 47.65, C                        | —                                 | —                                               | —                 | —                                          |
| 14                    | 48.78, CH                       | 1.51, m, 1H                       | 8, 15 $\alpha$ , 15 $\beta$                     | 9, 16, 18         | —                                          |
| 15 $\alpha$           | 30.58, CH <sub>2</sub>          | 1.89, m, 2H                       | 14, 15 $\beta$                                  | 13, 14, 16, 17    | 15 $\beta$                                 |
| 15 $\beta$            | 30.58, CH <sub>2</sub>          | 1.97, m, 2H                       | 14, 15 $\alpha$                                 | 13, 14, 16,       | 14, 15 $\alpha$ , 16 $\beta$ , 18          |
| 16 $\beta$            | 71.50, CH                       | 4.39, dd, 1H<br>(8.0, 1.0)        | 15 $\alpha$ , 15 $\beta$                        | 14, 15, 16, 17    | 15 $\beta$ , 18                            |
| 17                    | 129.60, C                       | —                                 | —                                               | —                 | —                                          |
| 18 (CH <sub>3</sub> ) | 19.65, C                        | 0.99, s, 3H                       | —                                               | 12, 13, 14, 17    | 8                                          |
| 19 (CH <sub>3</sub> ) | 14.09, C                        | 1.04, s, 3H                       | —                                               | 1, 5, 9, 10, 19   | 2 $\beta$ , 4 $\alpha$ , 8, 11 $\beta$     |
| 3 (OH)                | —                               | —                                 | —                                               | —                 | —                                          |
| 16 (OH)               | —                               | —                                 | —                                               | —                 | —                                          |

<sup>a</sup>500 MHz for <sup>1</sup>H NMR and 125.65 MHz for <sup>13</sup>C NMR. <sup>b</sup>Numbers of attached protons were determined by analysis of 2D spectra. <sup>c</sup>HMBC correlations are from the started protons to the indicated carbons. <sup>d</sup>NOESY correlations are from the started protons to the indicated protons.



**Table S7.** Spectroscopic data of 16 $\alpha$ -hydroxy-4-pregnane-3,11,20-trione. (in chloroform- $d_4$ )<sup>a</sup>. Yield of 16 $\alpha$ -hydroxy-4-pregnane-3,11,20-trione was 32.0 mg. HREI-MS: calculated for C<sub>21</sub>H<sub>27</sub>O<sub>4</sub> [M-H<sup>+</sup>], 343.19093; found 343.19125.

| no.                   | $\delta_c$ , mult. <sup>b</sup> | $\delta_H$ ( $J$ in Hz)                | COSY                                    | HMBC <sup>c</sup>      | NOESY <sup>d</sup>               |
|-----------------------|---------------------------------|----------------------------------------|-----------------------------------------|------------------------|----------------------------------|
| 1 $\alpha$            | 34.90, CH <sub>2</sub>          | 1.66, dt, 2H<br>(14.5, 4.5)            | 1 $\beta$ , 2 $\alpha$ , 2 $\beta$      | 2, 9, 10, 19           | 1 $\beta$                        |
| 1 $\beta$             | 34.90, CH <sub>2</sub>          | 2.78, m, 2H                            | 1 $\alpha$ , 2 $\alpha$ , 2 $\beta$     | 3, 5                   | 1 $\alpha$ , 19                  |
| 2 $\alpha$            | 33.83, CH <sub>2</sub>          | 2.33, m, 2H                            | 1 $\alpha$ , 1 $\beta$ , 2 $\beta$      | 4                      | 2 $\beta$                        |
| 2 $\beta$             | 33.83, CH <sub>2</sub>          | 2.49, m, 2H                            | 1 $\alpha$ , 1 $\beta$ , 2 $\alpha$     | 1, 3                   | 2 $\alpha$ , 19                  |
| 3                     | 200.24, C                       | —                                      | —                                       | —                      | —                                |
| 4                     | 124.89, CH                      | 5.76, s, 1H                            | —                                       | 2, 4, 6, 10            | 6 $\beta$                        |
| 5                     | 168.83, C                       | —                                      | —                                       | —                      | —                                |
| 6 $\alpha$            | 32.34, CH <sub>2</sub>          | 2.43, m, 2H                            | 6 $\beta$ , 7 $\alpha$ , 7 $\beta$      | 4, 5, 7                | 6 $\beta$                        |
| 6 $\beta$             | 32.34, CH <sub>2</sub>          | 2.33, m, 2H                            | 6 $\alpha$ , 7 $\beta$                  | —                      | 6 $\alpha$                       |
| 7 $\alpha$            | 32.17, CH <sub>2</sub>          | 1.96, m, 2H                            | 6 $\alpha$ , 6 $\beta$ , 7 $\beta$      | —                      | —                                |
| 7 $\beta$             | 32.17, CH <sub>2</sub>          | 1.31, m, 2H                            | 6 $\alpha$ , 6 $\beta$ , 7 $\alpha$ , 8 | —                      | 9                                |
| 8                     | 36.90, CH                       | 1.89, m, 1H                            | 9                                       | —                      | 19                               |
| 9                     | 63.20, CH                       | 1.96, m, 1H                            | 8                                       | 1, 7, 8, 9, 10, 11, 19 | 7 $\beta$                        |
| 10                    | 38.43, C                        | —                                      | —                                       | —                      | —                                |
| 11                    | 207.58, C                       | —                                      | —                                       | —                      | —                                |
| 12 $\alpha$           | 56.81, CH <sub>2</sub>          | 2.63, s, 2H                            | —                                       | 9, 11, 13, 14, 17, 18  | 17 $\alpha$ , 19                 |
| 12 $\beta$            | 56.81, CH <sub>2</sub>          | 2.63, s, 2H                            | —                                       | 11                     | 21                               |
| 13                    | 47.33, C                        | —                                      | —                                       | —                      | —                                |
| 14                    | 52.99, CH                       | 2.18, m, 1H                            | 15 $\alpha$ , 15 $\beta$                | 13, 17, 18             | 12 $\alpha$ , 17 $\alpha$        |
| 15 $\alpha$           | 34.90, CH <sub>2</sub>          | 1.80, m, 2H                            | 14                                      | 13, 16                 | —                                |
| 15 $\beta$            | 34.90, CH <sub>2</sub>          | 1.87, m, 2H                            | 14, 16 $\beta$                          | —                      | 16 $\beta$ , 18                  |
| 16 $\beta$            | 71.98, CH                       | 4.90, dddd, 1H<br>(9.0, 9.0, 7.0, 2.5) | 15 $\beta$ , 17 $\alpha$                | 14, 20                 | 15 $\beta$ , 18, 21              |
| 17 $\alpha$           | 72.18, CH                       | 2.74, d, 1H<br>(6.5)                   | 16 $\beta$ ,                            | 12, 13, 16, 17, 18, 20 | 12 $\alpha$ , 21                 |
| 18 (CH <sub>3</sub> ) | 15.58, CH <sub>3</sub>          | 0.63, s, 3H                            | —                                       | 12, 13, 14, 17, 18     | 12, 15 $\beta$ , 16 $\beta$ , 20 |
| 19 (CH <sub>3</sub> ) | 17.34, CH <sub>3</sub>          | 1.41, s, 3H                            | —                                       | 1, 5, 9, 10, 19        | —                                |
| 20                    | 207.17, C                       | —                                      | —                                       | —                      | —                                |
| 21 (CH <sub>3</sub> ) | 31.71, CH <sub>3</sub>          | 2.18, s, 3H                            | —                                       | 11, 21                 | 12 $\beta$ , 17 $\alpha$ , 18    |
| 16 (OH)               | —                               | —                                      | —                                       | —                      | —                                |

<sup>a</sup>500 MHz for <sup>1</sup>H NMR and 125.65 MHz for <sup>13</sup>C NMR. <sup>b</sup>Numbers of attached protons were determined by analysis of 2D spectra. <sup>c</sup>HMBC correlations are from the started protons to the indicated carbons. <sup>d</sup>NOESY correlations are from the started protons to the indicated protons.

**Table S8.** Spectroscopic data of 16 $\alpha$ -hydroxydeoxycorcoesterone (in mMethanol- $d_4$ )<sup>a</sup>. The yield of 16 $\alpha$ -hydroxydeoxycorticosterone was 51.9 mg. HREI-MS: calculated for C<sub>21</sub>H<sub>29</sub>O<sub>4</sub> [M-H<sup>+</sup>], 345.20658; found 345.20544.

| no.                   | $\delta_c$ , mult. <sup>b</sup> | $\delta_H$ ( $J$ in Hz)             | COSY                        | HMBC <sup>c</sup>          | NOESY <sup>d</sup>           |
|-----------------------|---------------------------------|-------------------------------------|-----------------------------|----------------------------|------------------------------|
| 1 $\alpha$            | 36.28, CH <sub>2</sub>          | 1.62, m, 2H                         | 2 $\alpha$                  | 2, 10                      | 2 $\alpha$ , 11 $\beta$      |
| 1 $\beta$             | 36.28, CH <sub>2</sub>          | 1.71, dt, 2H (14.5, 4.5)            | 2 $\beta$                   | 3, 9, 10, 19               | 2 $\beta$                    |
| 2 $\alpha$            | 36.02, CH <sub>2</sub>          | 1.81, m, 2H                         | 1 $\alpha$                  | 1, 2                       | 1 $\alpha$                   |
| 2 $\beta$             | 36.02, CH <sub>2</sub>          | 2.07, m, 2H                         | 1 $\beta$                   | 3, 10, 19                  | 1 $\beta$ , 19               |
| 3                     | 201.95, C                       | —                                   | —                           | —                          | —                            |
| 4                     | 123.98, CH                      | 5.71, s, 1H                         | —                           | 4, 6, 7, 10, 19            | 6 $\beta$                    |
| 5                     | 174.41, C                       | —                                   | —                           | —                          | —                            |
| 6 $\alpha$            | 34.39, CH <sub>2</sub>          | 2.46, m, 2H                         | 6 $\beta$ , 9               | 4, 8, 10                   | —                            |
| 6 $\beta$             | 34.39, CH <sub>2</sub>          | 2.29, m, 2H                         | 6 $\alpha$                  | 4, 10                      | 7 $\alpha$                   |
| 7 $\alpha$            | 33.49, CH <sub>2</sub>          | 2.47, m, 2H                         | 7 $\beta$                   | 5, 7, 8, 9                 | 6 $\beta$                    |
| 7 $\beta$             | 33.49, CH <sub>2</sub>          | 2.29, m, 2H                         | 7 $\alpha$ , 15 $\beta$     | 5, 8                       | —                            |
| 8                     | 36.28, CH <sub>2</sub>          | 1.57, m, 1H                         | —                           | 13                         | 15 $\beta$                   |
| 9                     | 54.83, CH                       | 1.06, m, 2H                         | 11 $\alpha$ , 11 $\beta$    | 10, 11                     | —                            |
| 10                    | 39.67, C                        | —                                   | —                           | —                          | —                            |
| 11 $\alpha$           | 21.42, CH <sub>2</sub>          | 1.63, m, 2H                         | 9, 11 $\beta$ , 12 $\alpha$ | 9, 11, 12                  | 9                            |
| 11 $\beta$            | 21.42, CH <sub>2</sub>          | 1.48, m, 2H                         | 9, 11 $\alpha$ , 18         | 8, 9, 11, 12               | 1 $\alpha$ , 18, 19          |
| 12 $\alpha$           | 39.25, CH <sub>2</sub>          | 1.50, m, 2H                         | 11 $\alpha$ , 12 $\beta$    | 11, 13, 14, 17, 18         | 12 $\beta$ , 17 $\alpha$     |
| 12 $\beta$            | 39.25, CH <sub>2</sub>          | 1.85, m, 2H                         | 11 $\alpha$ , 12 $\alpha$   | 9, 11, 12, 13, 14, 18      | 12 $\alpha$ , 18             |
| 13                    | 46.22, C                        | —                                   | —                           | —                          | —                            |
| 14                    | 54.75, CH                       | 1.58, m, 1H                         | —                           | 8, 12, 13, 17, 18          | 17 $\alpha$                  |
| 15 $\alpha$           | 32.84, CH <sub>2</sub>          | 1.85, m, 2H                         | 15 $\beta$                  | 13, 14, 16                 | —                            |
| 15 $\beta$            | 32.84, CH <sub>2</sub>          | 1.06, m, 2H                         | 15 $\alpha$ , 7 $\beta$     | 14                         | —                            |
| 16 $\beta$            | 72.98, CH                       | 4.74, dddd, 1H (7.0, 7.0, 3.5, 1.5) | 15 $\alpha$ , 17 $\alpha$   | 14, 16, 17, 20             | 18, 15 $\beta$               |
| 17 $\alpha$           | 69.53, CH                       | 2.48, m, 2H                         | —                           | 12, 13, 15, 16, 17, 18, 21 | 14, 12 $\alpha$              |
| 18 (CH <sub>3</sub> ) | 14.68, CH <sub>3</sub>          | 0.71, s, 3H                         | 11 $\beta$                  | 12, 13, 14, 17, 18         | 11 $\beta$ , 12 $\beta$      |
| 19 (CH <sub>3</sub> ) | 17.33, CH <sub>3</sub>          | 1.21, s, 3H                         | —                           | 1, 5, 9, 10, 19            | 2 $\beta$ , 11 $\beta$       |
| 20                    | 210.54, CH                      | —                                   | —                           | —                          | —                            |
| 21(CH <sub>2</sub> )  | 70.34, CH <sub>2</sub>          | 4.20, dd, 2H (20.5, 19.0)           | —                           | 20                         | 12 $\beta$ , 18, 17 $\alpha$ |
| 16 (OH)               | —                               | —                                   | —                           | —                          | —                            |
| 21 (OH)               | —                               | —                                   | —                           | —                          | —                            |

<sup>a</sup>500 MHz for <sup>1</sup>H NMR and 125.65 MHz for <sup>13</sup>C NMR. <sup>b</sup>Numbers of attached protons were determined by analysis of 2D spectra. <sup>c</sup>HMBC correlations are from the started protons to the indicated carbons. <sup>d</sup>NOESY correlations are from the started protons to the indicated protons.
